# Supplementary material for: Novel TiO2/TPU composite fiber-based smart textiles for photocatalytic applications
Source: Royal Society of Chemistry journal article supplement (doi:10.1039/d1ma01200b), 2022-01-01
Supplement: d1ma01200b1.pdf [file d1ma01200b1.pdf]

# Novel TiO<sub>2</sub>/TPU Composite Fiber-based Smart Textiles for Photocatalytic Applications

Jing Zhang,<sup>a</sup> Xuan Li,<sup>a</sup> Jian Guo,<sup>b</sup> Gengheng Zhou,<sup>c,d</sup> Li Xiang,<sup>e</sup> Shuguang Wang,<sup>a</sup> Zuoli He,<sup>a,\*</sup>

*a, Shandong Key Laboratory of Water Pollution Control and Resource Reuse, School of Environmental Science and Engineering, Shandong University, Qingdao 266237, China*

*b, China Academy of Launch Vehicle Technology, Beijing 100076, China*

*c, Suzhou Institute of Nano-Tech and Nano-Bionics, Chinese Academy of Sciences, Suzhou 215123, China*

*d, Gusu Laboratory of Materials, Gusu Laboratory of Materials, Suzhou 215123, China*

*e, Department of Chemistry, Pohang University of Science and Technology (POSTECH), Pohang, 37673, Republic of Korea*

---

\*Corresponding author. E-mail: [zlhe@sdu.edu.cn](mailto:zlhe@sdu.edu.cn) (Z. L. He)

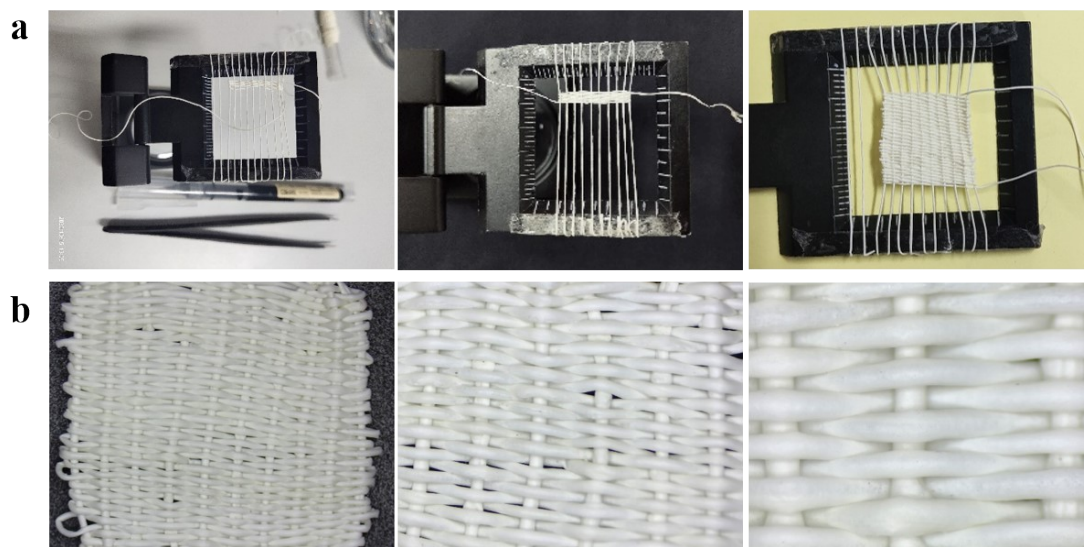

**Figure S1** The images of smart textiles for photocatalytic applications: (a) composite fiber woven into a textile; (b) the woven textile.

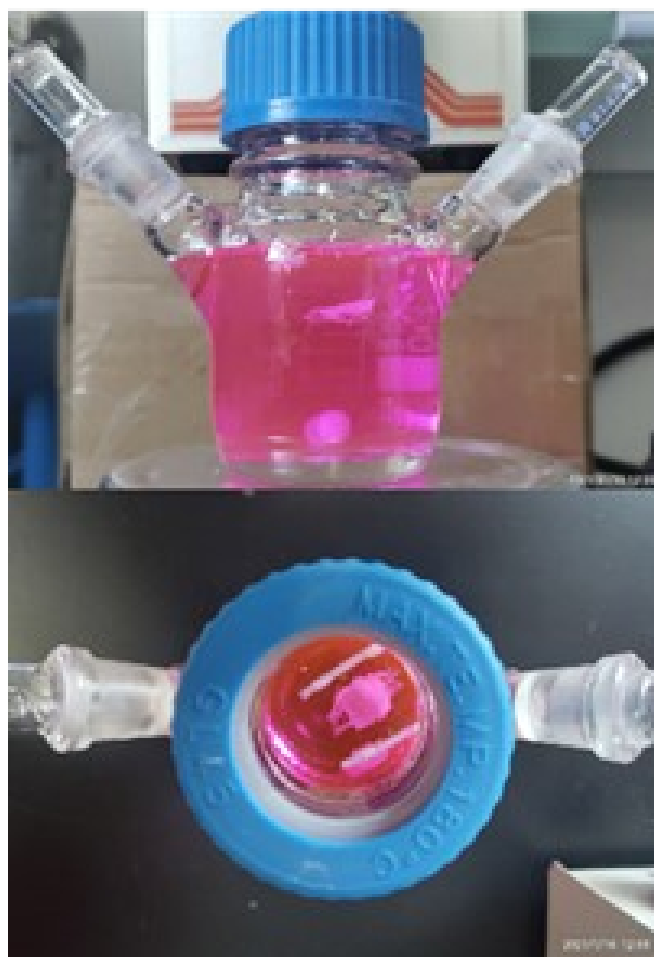

**Figure S2** The images of the smart textiles for photocatalytic degradation and Photocatalytic  $H_2$  production.

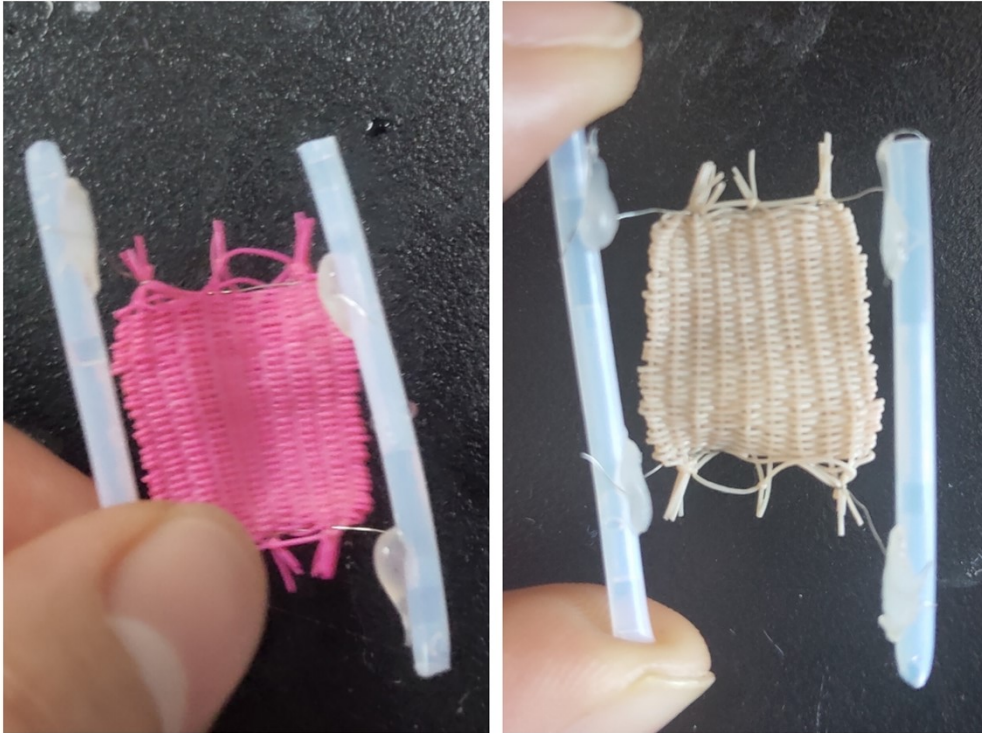

**Figure S3** The images of the smart textiles: (a) the RhB adsorbed; (b) After light irradiation for 10 min.

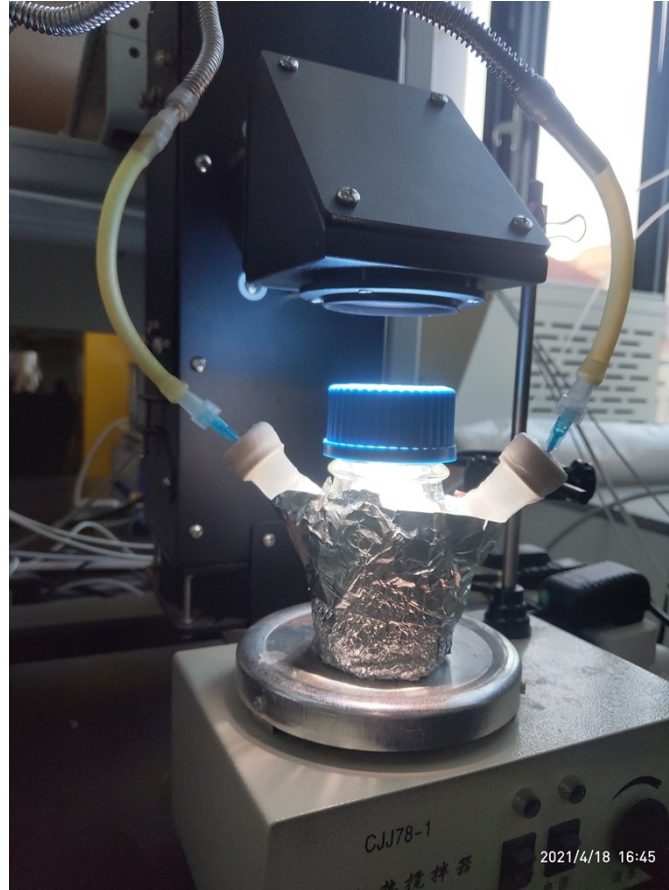

**Figure S4** The images of the smart textiles for Photocatalytic H<sub>2</sub> production.

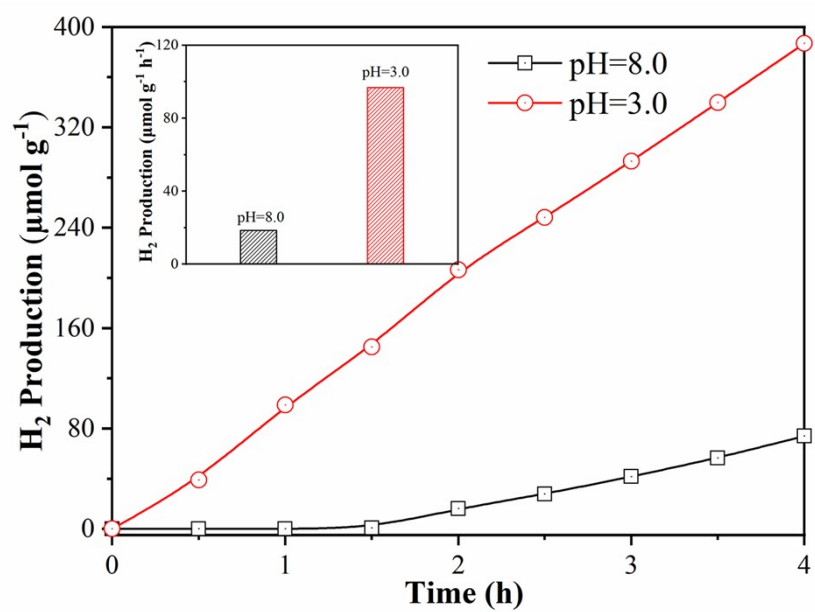

**Figure S5** Photocatalytic H<sub>2</sub> production of the smart textiles under different pH values .

**Table S1.** Comparison of photocatalytic activity of similar photocatalysts with our work.

| Photocatalytic pollutants degradation      |               |                              |                |              |                         |                                       |           |
|--------------------------------------------|---------------|------------------------------|----------------|--------------|-------------------------|---------------------------------------|-----------|
| Photocatalysts                             | Support       | Synthesis method             | Light source   | Pollutant    | Photocatalytic activity | photocatalyst weight                  | Ref.      |
| 1:5-TiO <sub>2</sub> /TPU textiles         | TPU           | Wet-spinning                 | 300 W Xe lamp  | 5 ppm RhB    | 99.6% in 240 min        | 16.5 mg (2.75 mg P25 in the textiles) | This work |
| PEDOT/BiVO <sub>4</sub> @Cotton            | Cotton        | Dipping                      | 1000 W Xe lamp | 60 ppm RB-19 | 95% in 120 min          | 0.4 g                                 | 1         |
| Ag/AgCl/polydopamine/cotton                | Cotton        | Dipping                      | 1000 W Xe lamp | 50 ppm RB-19 | 95% in 180 min          | 6 × 6 cm <sup>2</sup>                 | 2         |
| Carbon fibers/TiO <sub>2</sub>             | Carbon fibers | Dip-coating and hydrothermal | 300 W Xe lamp  | 10 ppm RhB   | 12.84% in 120 min       | -                                     | 3         |
| Ag-Ag <sub>2</sub> O/TiO <sub>2</sub> /PET | PET           | Magnetron sputtering         | 200 W Hg lamp  | 5 ppm RhB    | 65.2% in 360 min        | 50 mm in diameter                     | 4         |
| Ag-TiO <sub>2</sub> /PET                   | PET           | Magnetron sputtering         | 200 W UV lamp  | 5 ppm RhB    | 72.13% in 360 min       | -                                     | 5         |
| g-C <sub>3</sub> N <sub>4</sub> /PMMA/CFs  | PMMA/CFs      | Casting                      | Sunlight       | 10 ppm RhB   | 83% in 180 min          | 1 × 1 cm <sup>2</sup>                 | 6         |

| Photocatalytic hydrogen production                                                            |                     |                                            |               |                                                       |                                            |                                       |           |
|-----------------------------------------------------------------------------------------------|---------------------|--------------------------------------------|---------------|-------------------------------------------------------|--------------------------------------------|---------------------------------------|-----------|
| Photocatalysts                                                                                | Support             | Synthesis method                           | Light source  | Sacrificial reagent                                   | Photocatalytic activity                    | photocatalyst weight                  | Ref.      |
| 1wt%Pt-1:5 TiO <sub>2</sub> /TPU textiles                                                     | TPU                 | Wet-spinning                               | 300 W Xe lamp | 10 vol% methanol                                      | 81.75 μmol g <sup>-1</sup> h <sup>-1</sup> | 16.5 mg (2.75 mg P25 in the textiles) | This work |
| Co <sub>3</sub> O <sub>4</sub> @g-C <sub>3</sub> N <sub>4</sub> /carbon fiber                 | Carbon nanofiber    | Vapor deposition; Hydrothermal             | 300 W Xe lamp | 10 vol% TEOA                                          | 67.17 μmol g <sup>-1</sup> h <sup>-1</sup> | 5 mg                                  | 7         |
| Bi <sub>12</sub> TiO <sub>20</sub> /Bi <sub>4</sub> Ti <sub>3</sub> O <sub>12</sub> nanofiber | PVP                 | Electrospinning                            | 300 W Xe lamp | Na <sub>2</sub> SO <sub>3</sub> and Na <sub>2</sub> S | 7.44 μmol g <sup>-1</sup> h <sup>-1</sup>  | 10 mg                                 | 8         |
| CdS/CNF                                                                                       | CNF mats            | Ionic layer adsorption and reaction method | 150 W Xe lamp | Na <sub>2</sub> SO <sub>3</sub> and Na <sub>2</sub> S | 1.5 μmol g <sup>-1</sup> h <sup>-1</sup>   | 3 cm × 0.5 cm                         | 9         |
| ZnS-AgIn <sub>5</sub> S <sub>8</sub> /fluoropolymer fiber                                     | fluoropolymer fiber | Electrospinning hydrothermal               | 350 W Xe lamp | Na <sub>2</sub> SO <sub>3</sub> and Na <sub>2</sub> S | 120mL (40h)                                | -                                     | 10        |

## References

1. Yu, B.; Reddy, N.; Liu, B.; Zhu, Z.; Wang, W.; Hu, C., Sequential assembly of PEDOT/BiVO<sub>4</sub>/FeOOH onto cotton fabrics for photocatalytic degradation of reactive dyes. *Cellulose* **2021**, *28* (17), 11051-11066.
2. Ding, K.; Wang, W.; Yu, D.; Wang, W.; Gao, P.; Liu, B., Facile formation of flexible Ag/AgCl/polydopamine/cotton fabric composite photocatalysts as an efficient visible-light photocatalysts. *Applied Surface Science* **2018**, *454*, 101-111.
3. Zhang, Y.; Shi, Z.; Luo, L.; Liu, Z.; Macharia, D. K.; Duorkun, G.; Shen, C.; Liu, J.; Zhang, L., Construction of titanium dioxide/cadmium sulfide heterojunction on carbon fibers as weavable photocatalyst for eliminating various contaminants. *Journal of Colloid and Interface Science* **2020**, *561*, 307-317.
4. Yu, H.-L.; Wu, Q.-X.; Wang, J.; Liu, L.-Q.; Zheng, B.; Zhang, C.; Shen, Y.-G.; Huang, C.-L.; Zhou, B.; Jia, J.-R., Simple fabrication of the Ag-Ag<sub>2</sub>O-TiO<sub>2</sub> photocatalyst thin films on polyester fabrics by magnetron sputtering and its photocatalytic activity. *Applied Surface Science* **2020**, *503*, 144075.
5. Yuan, X.; Liang, S.; Ke, H.; Wei, Q.; Huang, Z.; Chen, D., Photocatalytic property of polyester fabrics coated with Ag/TiO<sub>2</sub> composite films by magnetron sputtering. *Vacuum* **2020**, *172*, 109103.

6. Wang, S.; Dai, X.; Li, F.; Sun, J.; Wu, C.; Xu, Y.; Fan, H.; Ai, S., Floating and stable g-C<sub>3</sub>N<sub>4</sub>/PMMA/CFs porous film: an automatic photocatalytic reaction platform for dye water treatment under solar light. *Journal of Porous Materials* **2019**, *27* (2), 465-472.
7. He, R.; Liang, H.; Li, C.; Bai, J., Enhanced photocatalytic hydrogen production over Co<sub>3</sub>O<sub>4</sub>@g-C<sub>3</sub>N<sub>4</sub> p-n junction adhering on one-dimensional carbon fiber. *Colloids and Surfaces A: Physicochemical and Engineering Aspects* **2020**, *586*, 124200.
8. Meng, A.; Xing, J.; Guo, W.; Li, Z.; Wang, X., Electrospinning synthesis of porous Bi<sub>12</sub>TiO<sub>20</sub>/Bi<sub>4</sub>Ti<sub>3</sub>O<sub>12</sub> composite nanofibers and their photocatalytic property under simulated sunlight. *Journal of Materials Science* **2018**, *53* (20), 14328-14336.
9. Kim, Y. K.; Kim, M.; Hwang, S.-H.; Lim, S. K.; Park, H.; Kim, S., CdS-loaded flexible carbon nanofiber mats as a platform for solar hydrogen production. *International Journal of Hydrogen Energy* **2015**, *40* (1), 136-145.
10. He, M.; Fan, W.; Ma, H.; Zhou, Z.; Xu, W., Preparation of ZnS-AgIn<sub>5</sub>S<sub>8</sub>/fluoropolymer fiber composites and its photocatalytic H<sub>2</sub> evolution from splitting of water under similar sunlight irradiation. *Catalysis Communications* **2012**, *22*, 89-93.
